# Supplementary material for: Bevacizumab improves tumor infiltration of mature dendritic cells and effector T-cells in triple-negative breast cancer patients
Source: PubMed Central journal article supplement (PMC8242049; doi:10.1038/s41698-021-00197-w), 2021-06-29
Supplement: 41698_2021_197_MOESM1_ESM.pdf [file 41698_2021_197_MOESM1_ESM.pdf]

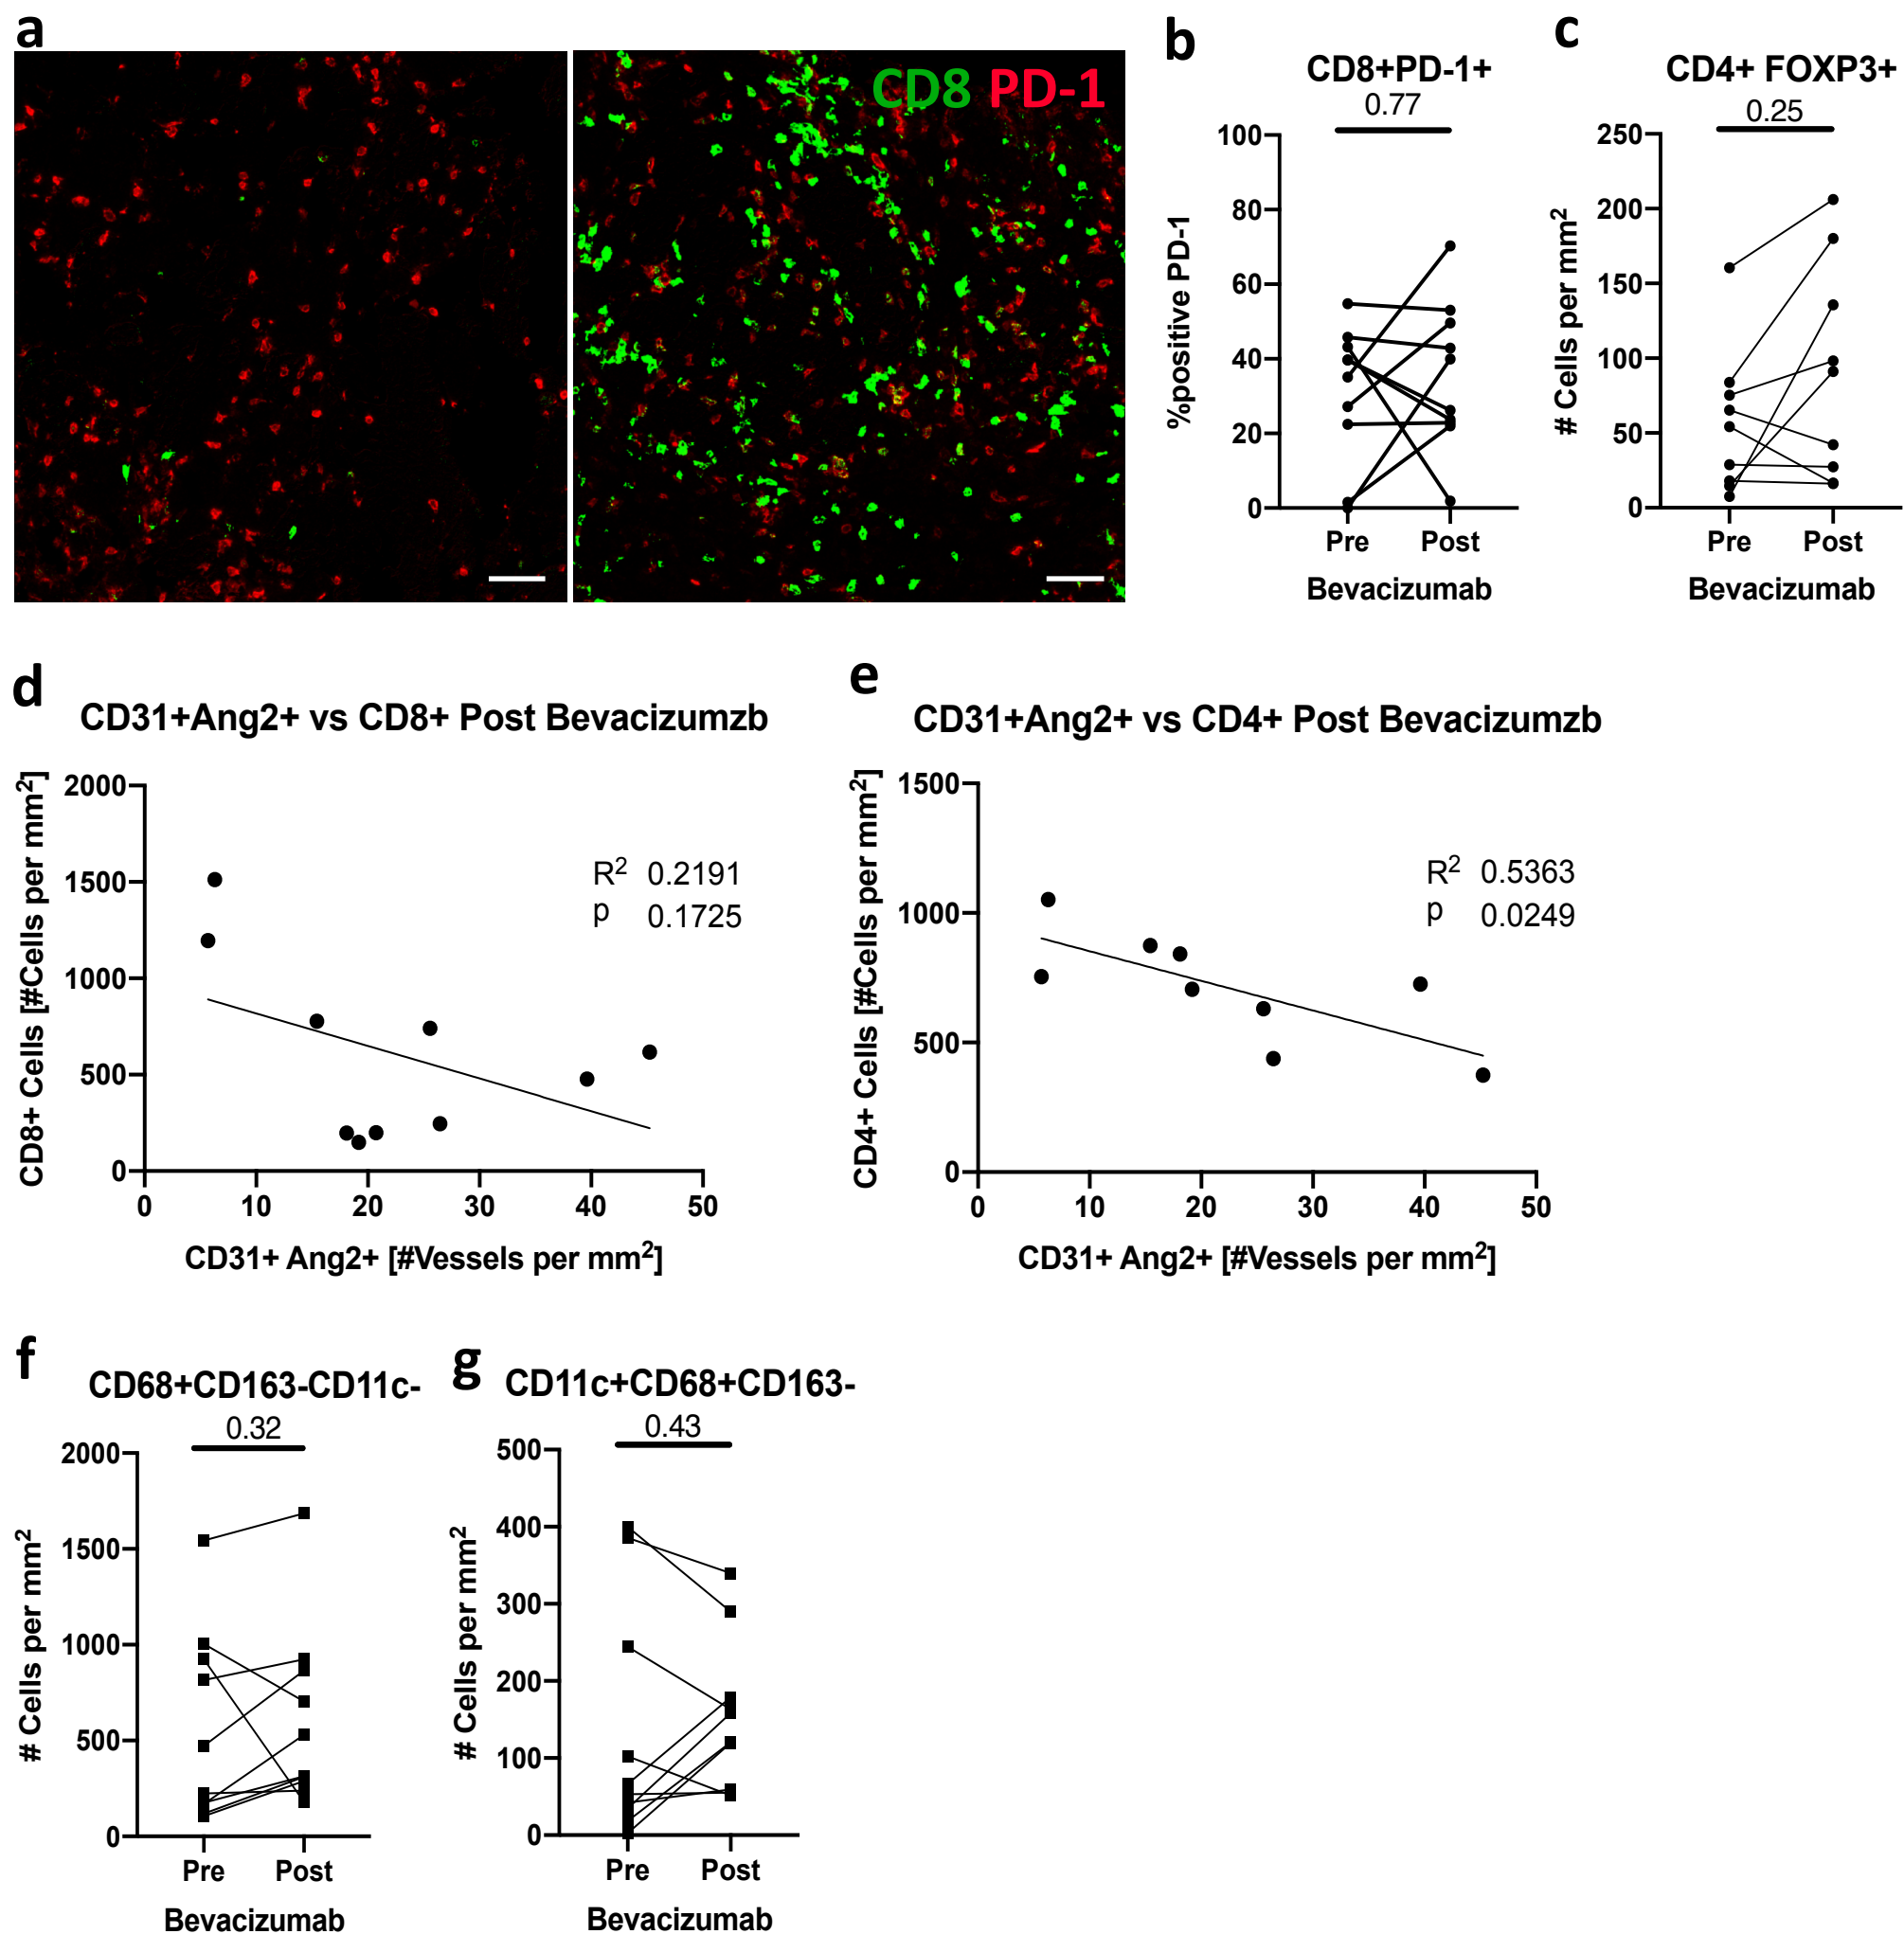

**Supplementary Figure 1: Effect of bevacizumab on T cell and macrophage subsets and relationship between CD31+Ang2+ vessels and T cells.** Representative images of CD8 and PD-1 immunofluorescence pre- and post-bevacizumab; Bar = 100  $\mu$ m. **(b)** Fraction of CD8+PD-1+ T cells pre- versus post-bevacizumab. **(c)** Quantitative analyses of CD4+FOXP3+ cells. **(d-e)** Post- bevacizumab correlation between overall CD8+ T-cells and CD31+Ang-2+ vessels **(d)**, and CD4+ T-cells and CD31+Ang-2+ vessels **(e)**. **(f-g)** Quantitative analyses of CD68+CD163-CD11c- cells **(f)** and CD11c+CD68+CD163- cells **(g)**.

Pre Bevacizumab Spearman Correlation

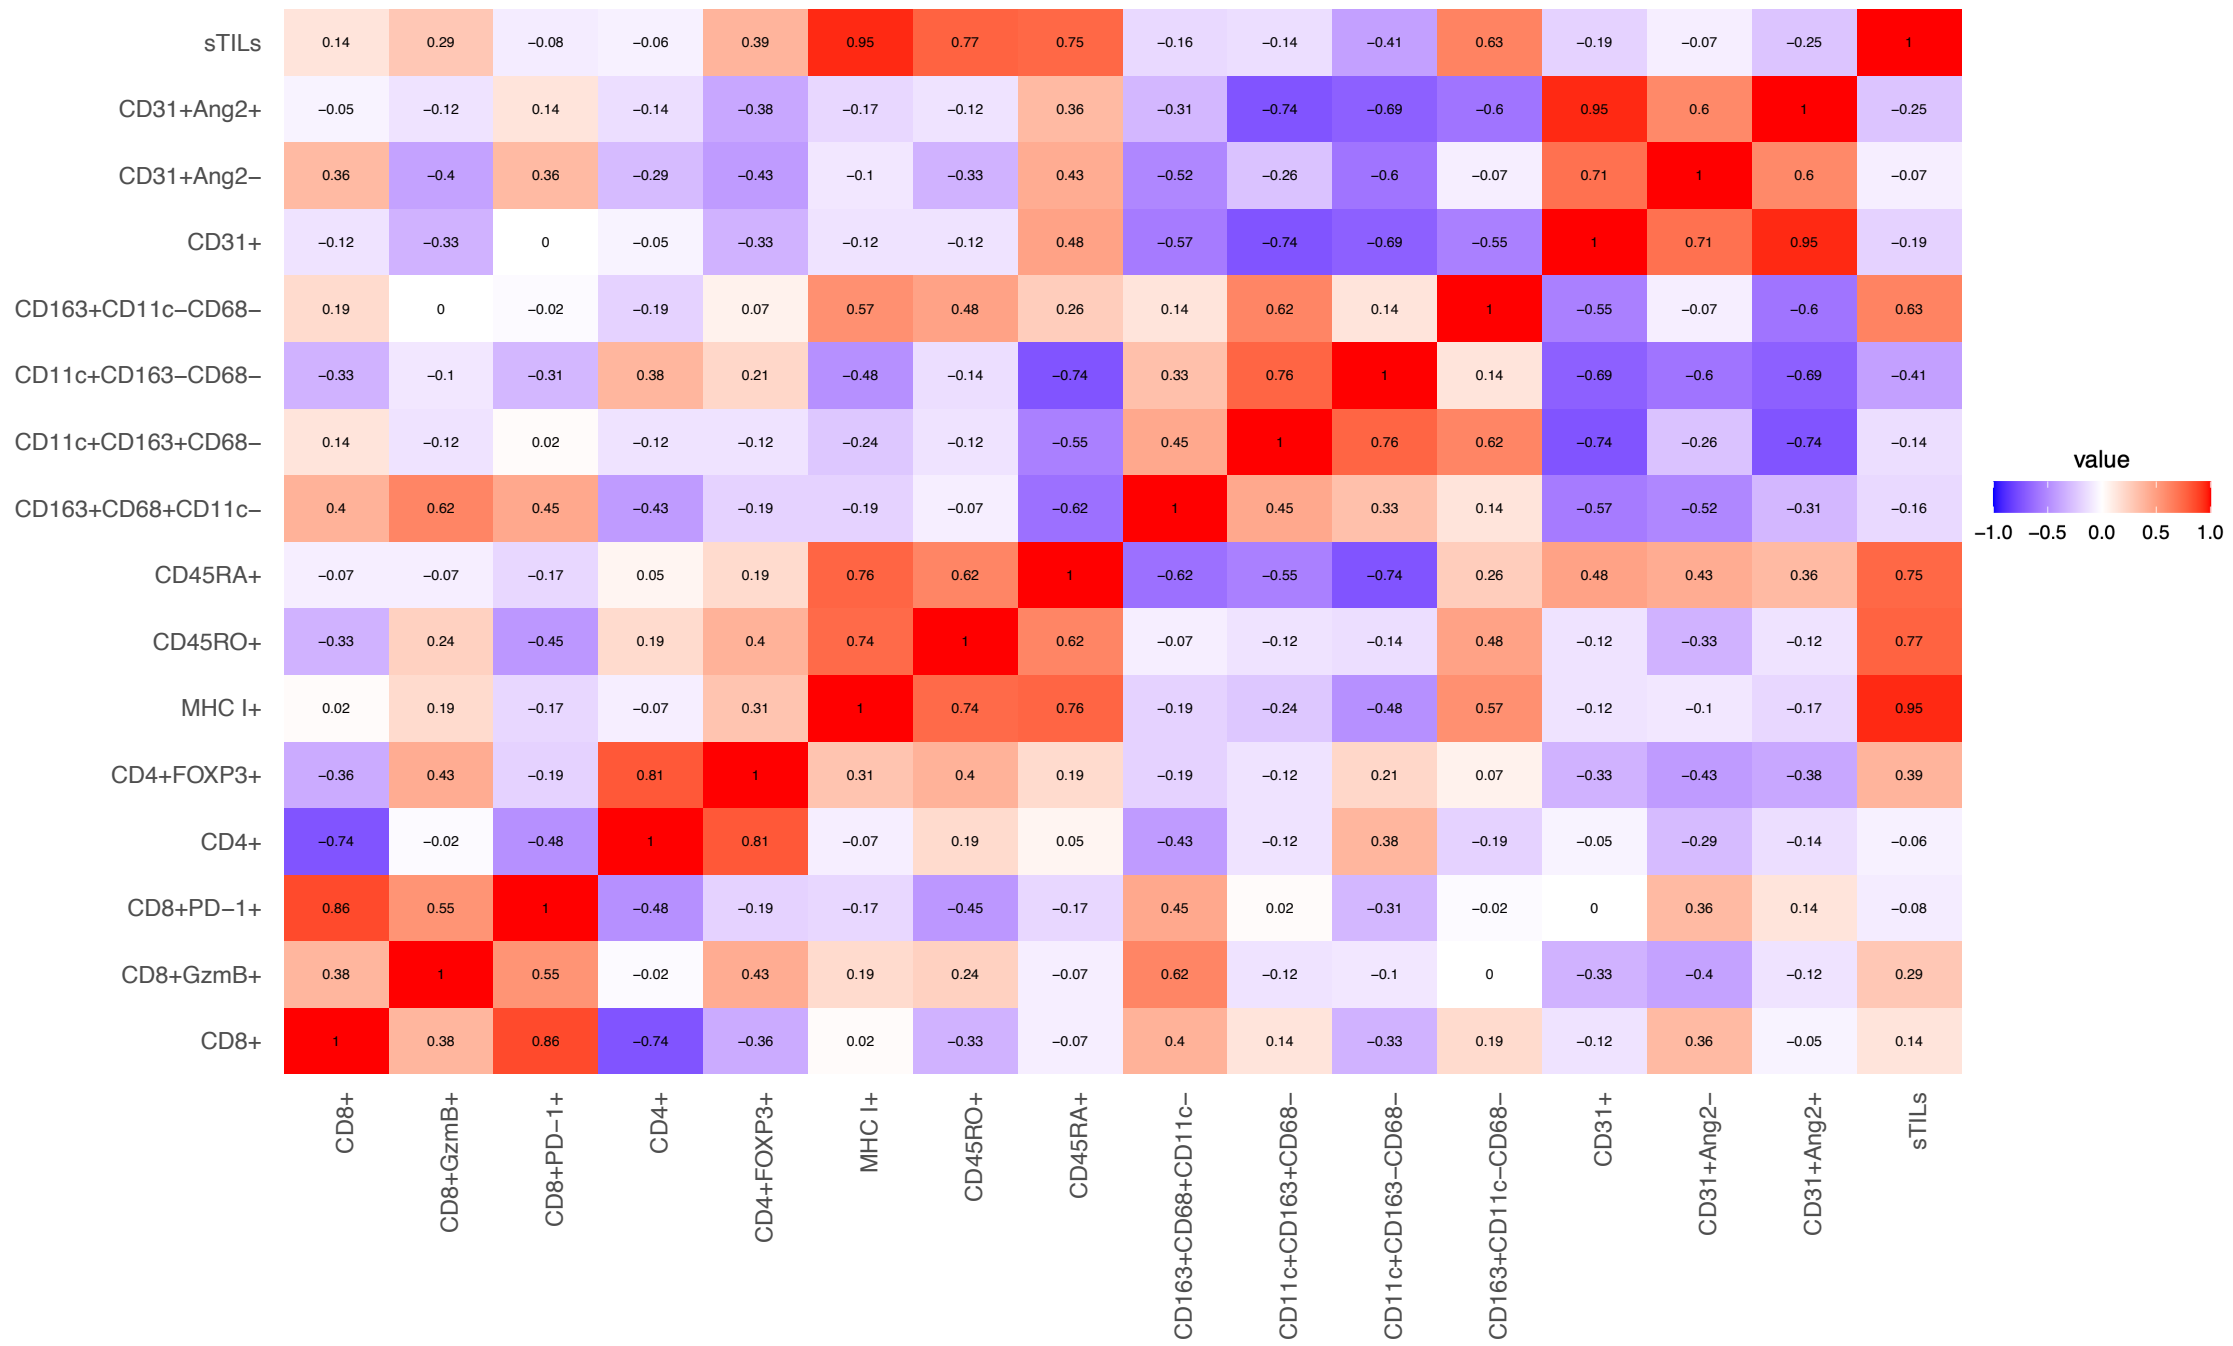

Post Bevacizumab Spearman Correlation

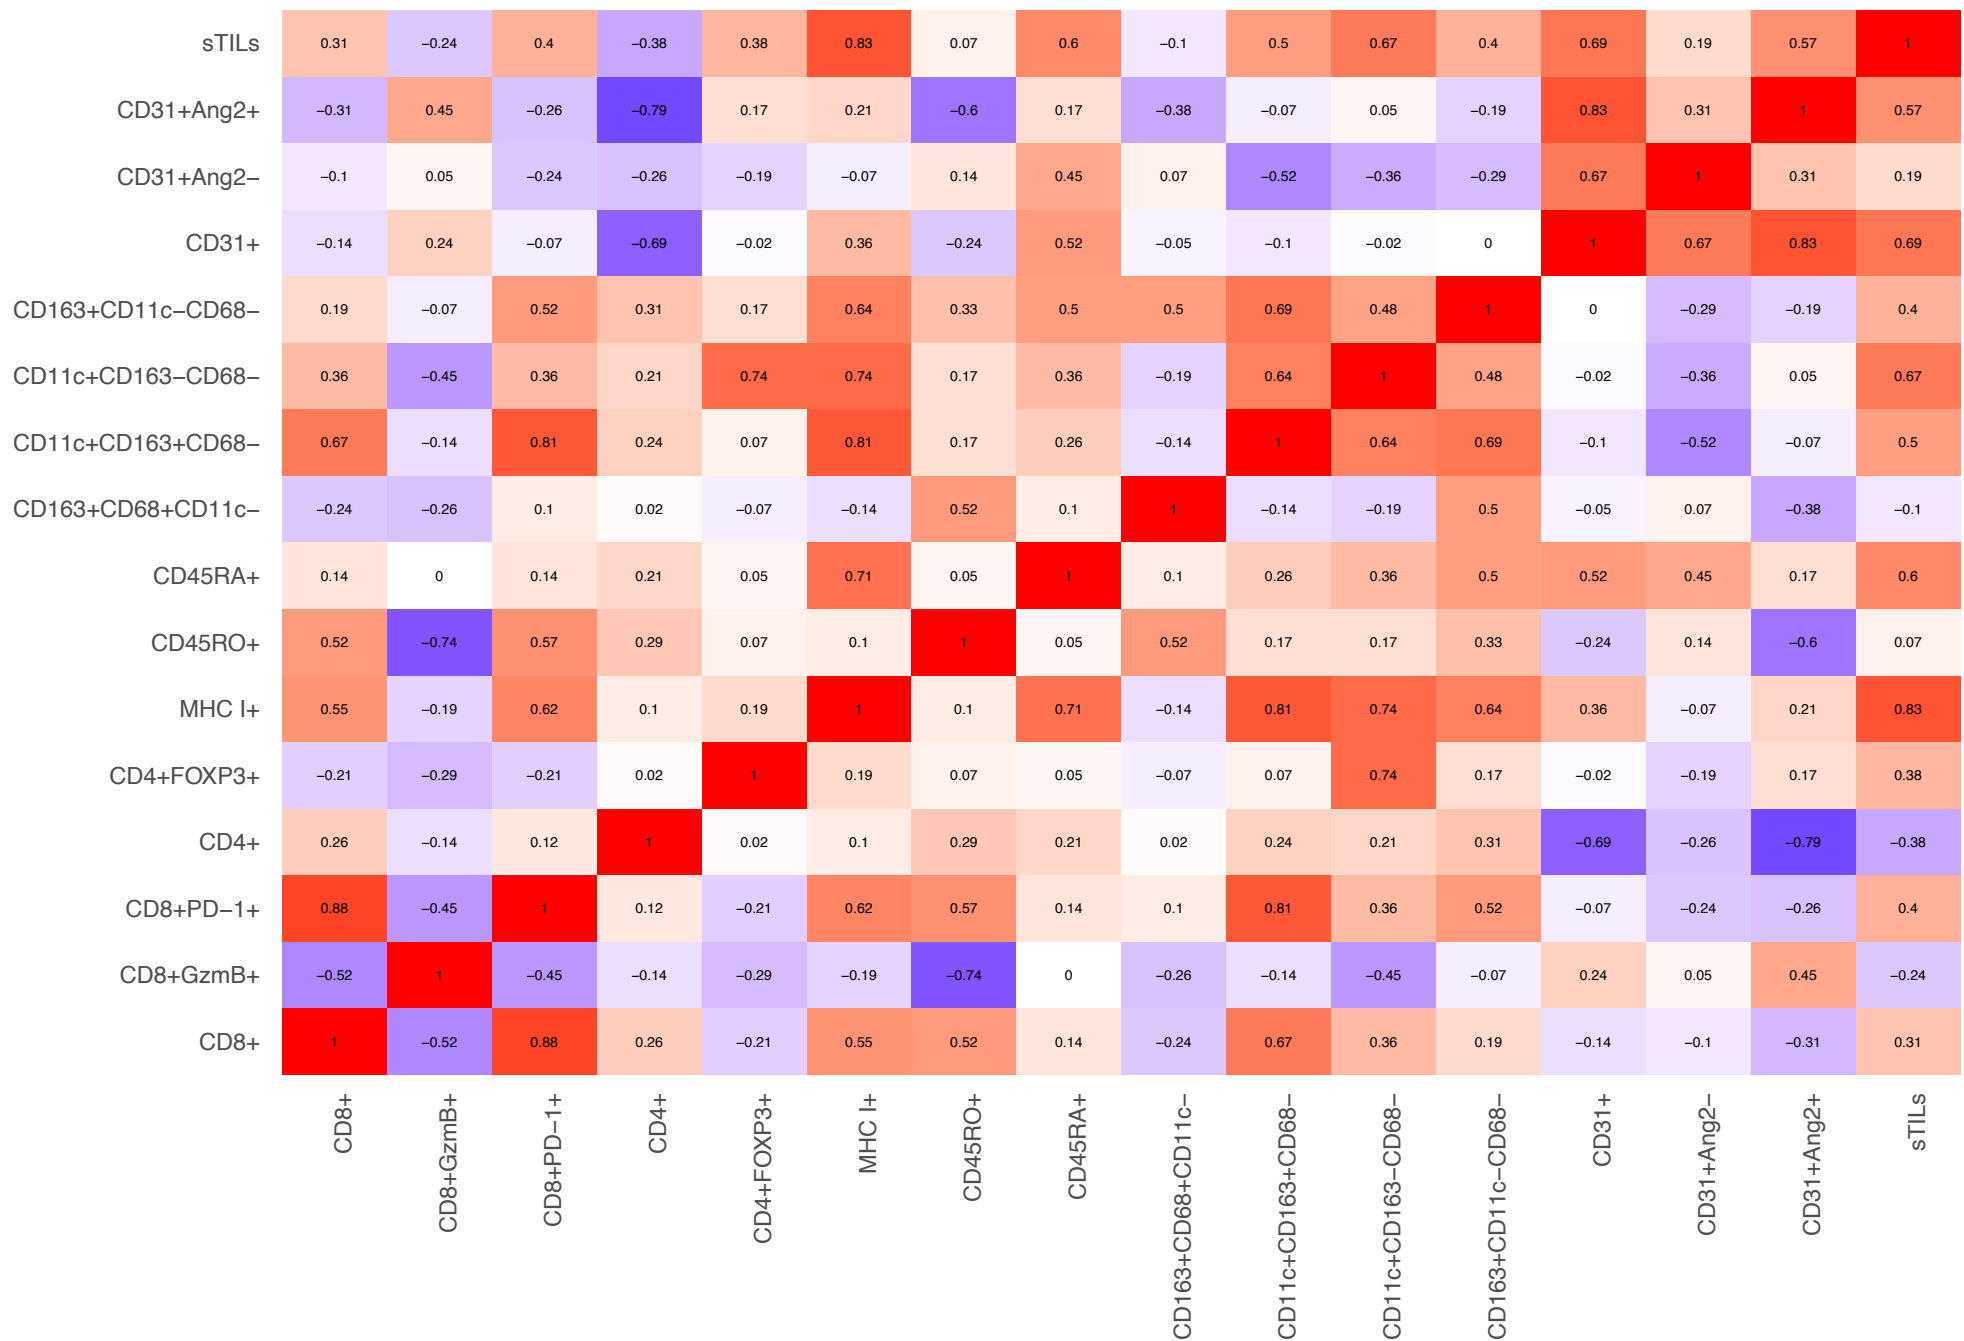

**Supplementary Figure 2: Heatmap of Spearman's rank correlation of immune and vessel biomarkers pre- and post-bevacizumab.** Correlation coefficients are indicated by a color scheme (legend) and discrete values between 1 and -1.

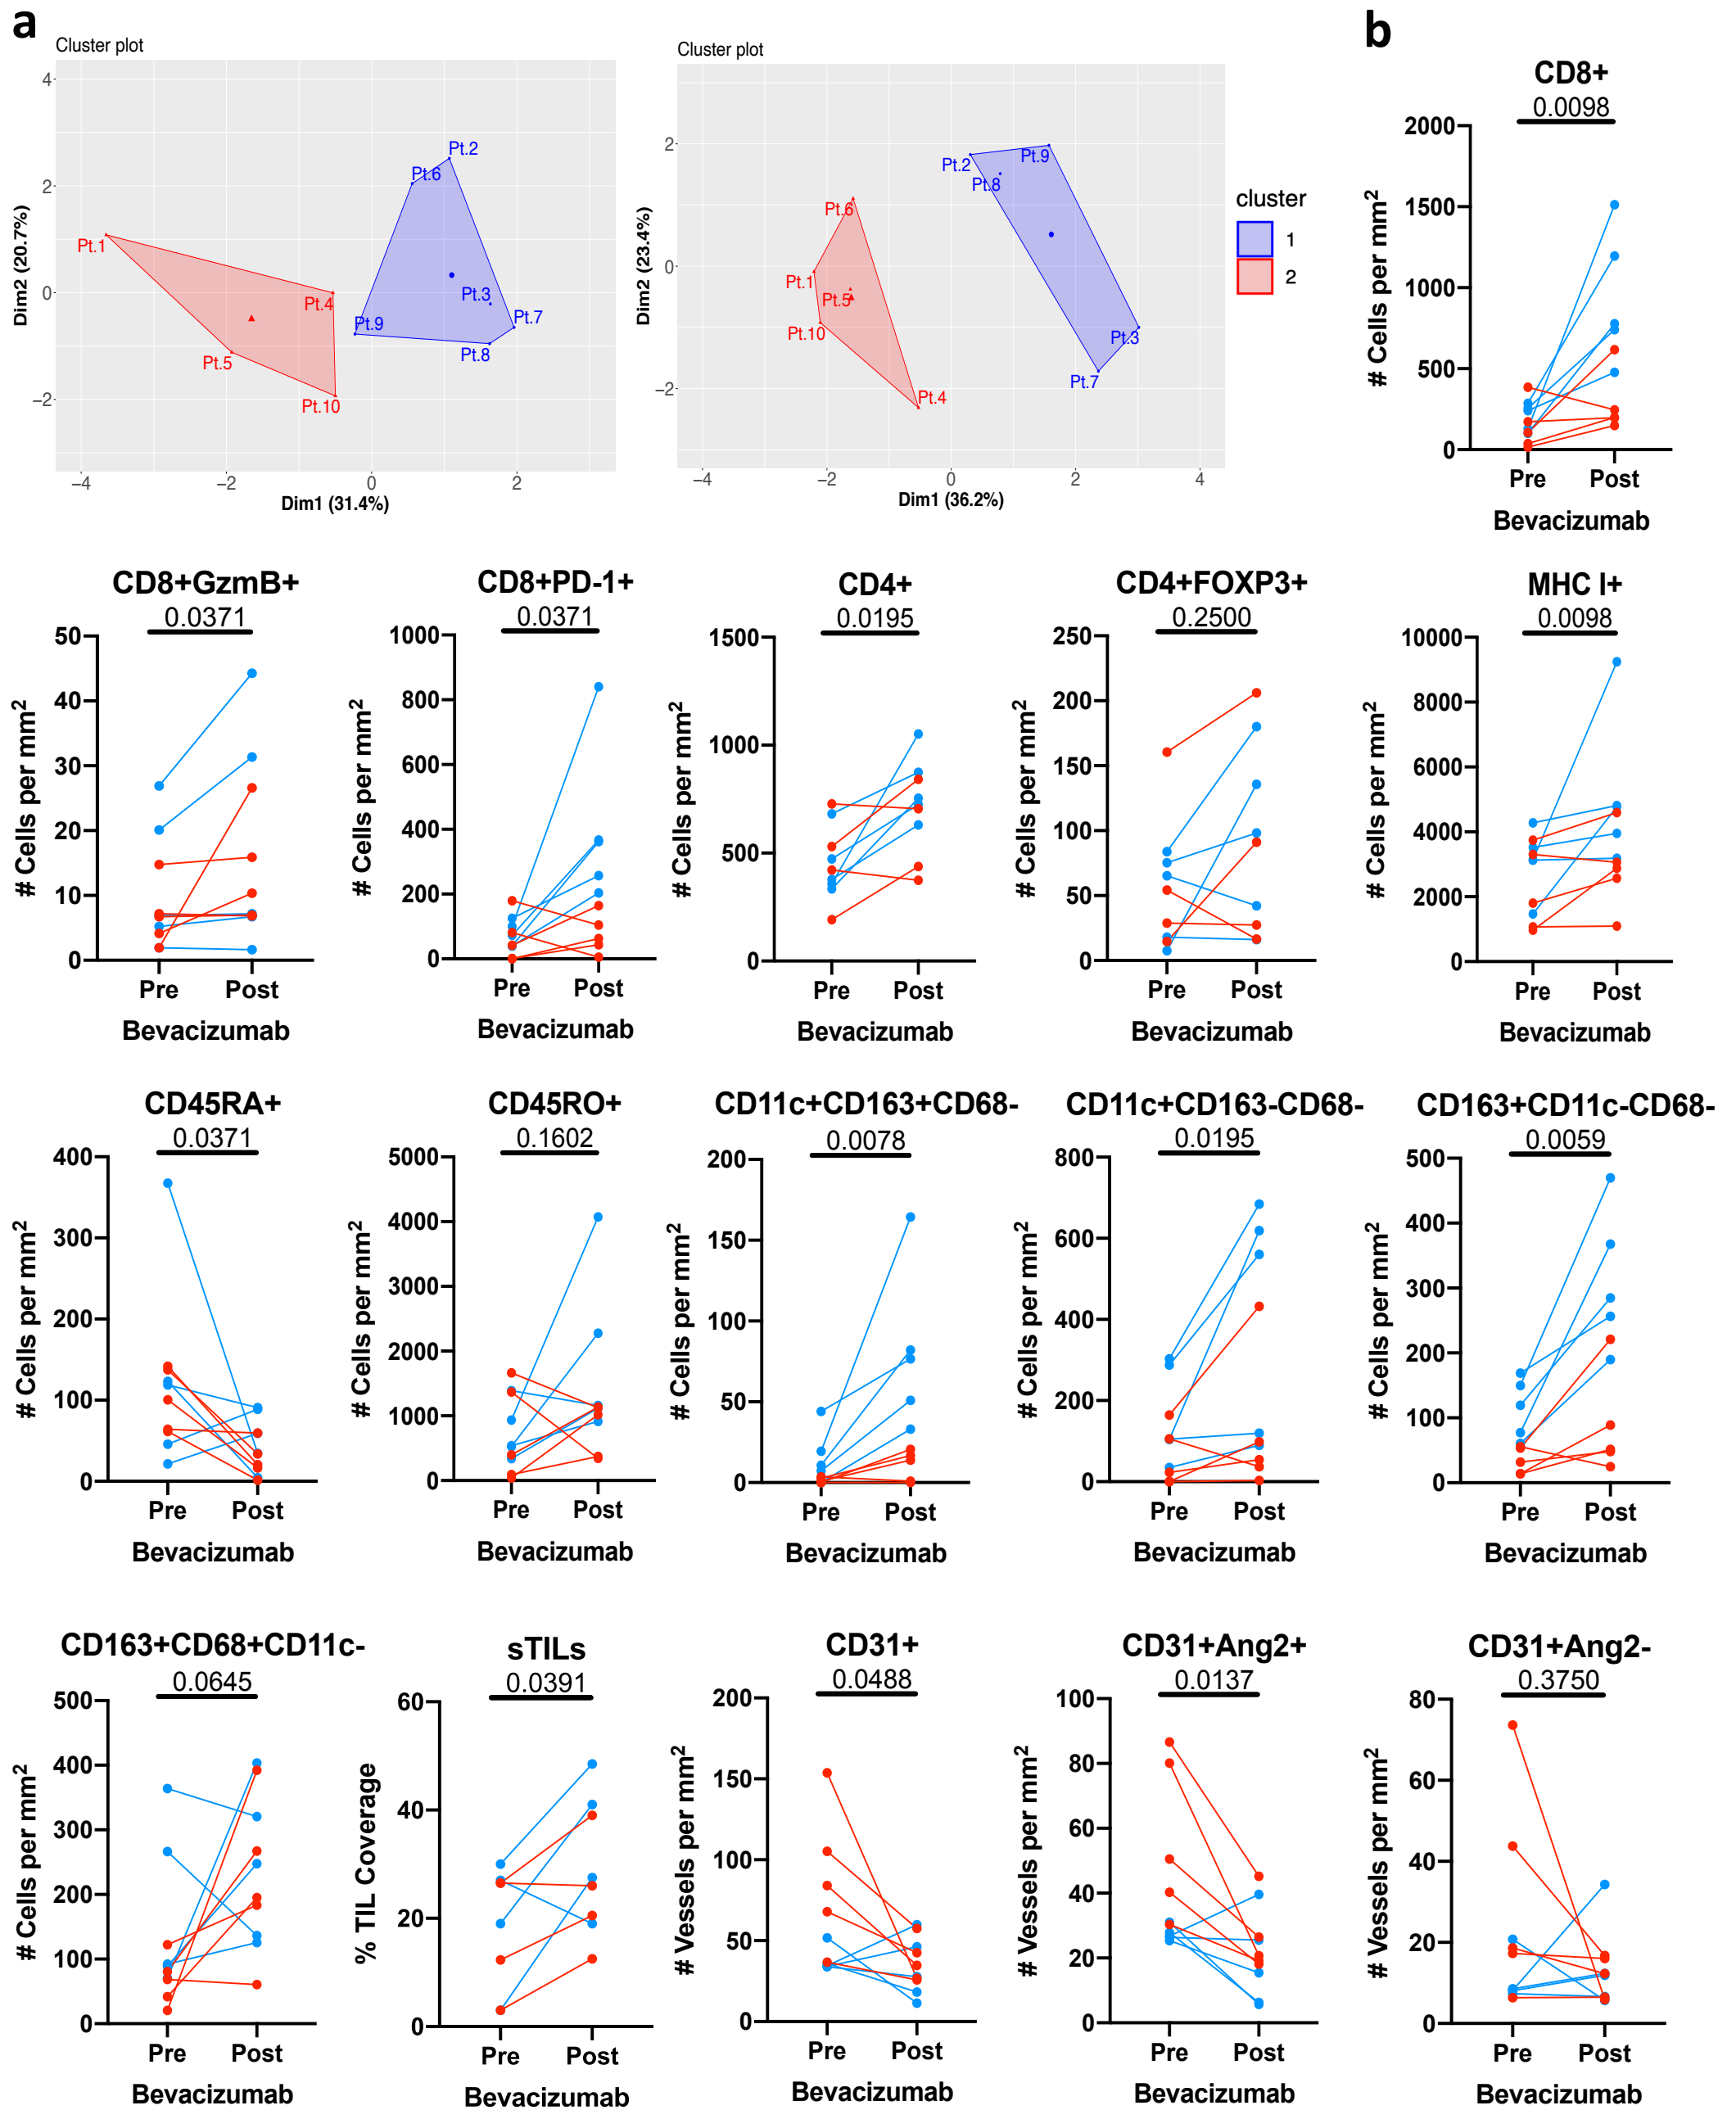

**Supplementary Figure 3: Principal component analysis and k-means clustering of pre- and post-bevacizumab results. (a)** Colored polygons show clustering of two patient groups pre- and post-bevacizumab. **(b)** Plots of 16 immune biomarkers separated in cluster 1 (blue) and cluster 2 (red) based on post-bevacizumab clustering.

## Supplementary Table 1

| Marker     | Antibody clone | Company                   | Catalog #      | Antibody dilution | Channel |
|------------|----------------|---------------------------|----------------|-------------------|---------|
| CD68       | PGM1           | Agilent Dako              | M0876          | 1:2000            | 540     |
| CD163      | 10D6           | Leica                     | NCL-L-CD163    | 1:1500            | 620     |
| CD11c      | 5D11           | Leica                     | CD11C-563-L-CE | 1:1500            | 690     |
| CD8        | C8/144B        | Agilent Dako              | M710301        | 1:5000            | 540     |
| PD-1       | EH33           | Cell Signaling Technology | 43248S         | 1:11000           | 620     |
| CD31       | Polyclonal     | Abcam                     | Ab28364        | 1:250             | 690     |
| Ang2       | F-1            | Santa Cruz                | Sc-74403       | 1:250             | 520     |
| CD4        | 4B12           | Dako                      | M731029        | 1:250             | 540     |
| FOXP3      | 206D           | BioLegend                 | 320102         | 1:2000            | 570     |
| Granzyme B | GrB7           | Dako                      | M7235          | 1:100             | 620     |
| CD45RA     | 4KB5           | Thermofisher              | MA5-12490      | 1:150             | Cy3     |
| CD45RO     | UCHL1          | Dako                      | M0742          | 1:500             | AF488   |
| MHC-I      | EMR8-5         | Abcam                     | Ab70328        | 1:6000            | AF488   |
