# Supplementary material for: Bevacizumab improves tumor infiltration of mature dendritic cells and effector T-cells in triple-negative breast cancer patients
Source: PubMed Central journal article supplement (PMC8242049; doi:10.1038/s41698-021-00197-w), 2021-06-29
Supplement: 41698_2021_197_MOESM2_ESM.pdf [file 41698_2021_197_MOESM2_ESM.pdf]

## Reporting Summary

Nature Research wishes to improve the reproducibility of the work that we publish. This form provides structure for consistency and transparency in reporting. For further information on Nature Research policies, see our [Editorial Policies](#) and the [Editorial Policy Checklist](#).

### Statistics

For all statistical analyses, confirm that the following items are present in the figure legend, table legend, main text, or Methods section.

n/a Confirmed

- The exact sample size ( $n$ ) for each experimental group/condition, given as a discrete number and unit of measurement
- A statement on whether measurements were taken from distinct samples or whether the same sample was measured repeatedly
- The statistical test(s) used AND whether they are one- or two-sided  
*Only common tests should be described solely by name; describe more complex techniques in the Methods section.*
- A description of all covariates tested
- A description of any assumptions or corrections, such as tests of normality and adjustment for multiple comparisons
- A full description of the statistical parameters including central tendency (e.g. means) or other basic estimates (e.g. regression coefficient) AND variation (e.g. standard deviation) or associated estimates of uncertainty (e.g. confidence intervals)
- For null hypothesis testing, the test statistic (e.g.  $F$ ,  $t$ ,  $r$ ) with confidence intervals, effect sizes, degrees of freedom and  $P$  value noted  
*Give  $P$  values as exact values whenever suitable.*
- For Bayesian analysis, information on the choice of priors and Markov chain Monte Carlo settings
- For hierarchical and complex designs, identification of the appropriate level for tests and full reporting of outcomes
- Estimates of effect sizes (e.g. Cohen's  $d$ , Pearson's  $r$ ), indicating how they were calculated

*Our web collection on [statistics for biologists](#) contains articles on many of the points above.*

### Software and code

Policy information about [availability of computer code](#)

Data collection Mantra Quantitative Pathology Workstation

Data analysis QuPath: 0.2.3, Python: 3.7.3, R 4.0.2

For manuscripts utilizing custom algorithms or software that are central to the research but not yet described in published literature, software must be made available to editors and reviewers. We strongly encourage code deposition in a community repository (e.g. GitHub). See the Nature Research [guidelines for submitting code & software](#) for further information.

### Data

Policy information about [availability of data](#)

All manuscripts must include a [data availability statement](#). This statement should provide the following information, where applicable:

- Accession codes, unique identifiers, or web links for publicly available datasets
- A list of figures that have associated raw data
- A description of any restrictions on data availability

The datasets generated during and/or analyzed during the current study are available from the corresponding authors on reasonable request.

## Field-specific reporting

Please select the one below that is the best fit for your research. If you are not sure, read the appropriate sections before making your selection.

Life sciences  Behavioural & social sciences  Ecological, evolutionary & environmental sciences

For a reference copy of the document with all sections, see [nature.com/documents/nr-reporting-summary-flat.pdf](https://nature.com/documents/nr-reporting-summary-flat.pdf)

## Life sciences study design

All studies must disclose on these points even when the disclosure is negative.

|                 |                                                                                                                                                                                                                                                                                                                                                                                                                               |
|-----------------|-------------------------------------------------------------------------------------------------------------------------------------------------------------------------------------------------------------------------------------------------------------------------------------------------------------------------------------------------------------------------------------------------------------------------------|
| Sample size     | 10 paired triple-negative breast cancer biopsies (obtained before and 2 weeks after the injection of bevacizumab) were included in this study. No sample size calculation was performed. In a previous study we showed that 7 paired human triple-negative breast cancer samples was sufficient to find significant differences in vascular parameters between pre- and post-bevacizumab samples (Tolaney et al., PNAS 2015). |
| Data exclusions | For the analysis of stromal tumor-infiltrating lymphocytes 2/10 paired-biopsy samples were excluded because there was insufficient stroma in those samples.                                                                                                                                                                                                                                                                   |
| Replication     | No specific study has been performed yet to reproduce the specific effects of bevacizumab on the recruitment of immune cells in triple-negative breast cancer. However, in other human tumor types bevacizumab also increased the recruitment of T cells and the expression of MHC-I.                                                                                                                                         |
| Randomization   | This study was not randomized.                                                                                                                                                                                                                                                                                                                                                                                                |
| Blinding        | The scientists who performed the imaging and quantitative analysis of immune cells and blood vessels were blinded.                                                                                                                                                                                                                                                                                                            |

## Reporting for specific materials, systems and methods

We require information from authors about some types of materials, experimental systems and methods used in many studies. Here, indicate whether each material, system or method listed is relevant to your study. If you are not sure if a list item applies to your research, read the appropriate section before selecting a response.

### Materials & experimental systems

| n/a                                 | Involvement in the study                                        |
|-------------------------------------|-----------------------------------------------------------------|
| <input type="checkbox"/>            | <input checked="" type="checkbox"/> Antibodies                  |
| <input checked="" type="checkbox"/> | <input type="checkbox"/> Eukaryotic cell lines                  |
| <input checked="" type="checkbox"/> | <input type="checkbox"/> Palaeontology and archaeology          |
| <input checked="" type="checkbox"/> | <input type="checkbox"/> Animals and other organisms            |
| <input type="checkbox"/>            | <input checked="" type="checkbox"/> Human research participants |
| <input type="checkbox"/>            | <input checked="" type="checkbox"/> Clinical data               |
| <input checked="" type="checkbox"/> | <input type="checkbox"/> Dual use research of concern           |

### Methods

| n/a                                 | Involvement in the study                        |
|-------------------------------------|-------------------------------------------------|
| <input checked="" type="checkbox"/> | <input type="checkbox"/> ChIP-seq               |
| <input checked="" type="checkbox"/> | <input type="checkbox"/> Flow cytometry         |
| <input checked="" type="checkbox"/> | <input type="checkbox"/> MRI-based neuroimaging |

## Antibodies

| Antibodies used | Antibody   | Clone      | Company              | Catalogue #    |
|-----------------|------------|------------|----------------------|----------------|
|                 | CD68       | PGM1       | Agilent Dako         | M0876          |
|                 | CD163      | 10D6       | Leica                | NCL-L-CD163    |
|                 | CD11c      | 5D11       | Leica                | CD11C-563-L-CE |
|                 | CD8        | C8/144B    | Agilent Dako         | M710301        |
|                 | PD-1       | EH-33      | Cell Signaling Tech. | 43248S         |
|                 | CD31       | Polyclonal | Abcam                | AB28364        |
|                 | Ang2       | F-1        | Santa Cruz           | SC-74403       |
|                 | CD4        | 4B12       | Dako                 | M731029        |
|                 | FOXP3      | 206D       | BioLegend            | 320102         |
|                 | CD45RA     | 4KB5       | ThermoFisher         | MA5-12490      |
|                 | CD45RO     | UCHL1      | Dako                 | M0742          |
|                 | MHC-I      | EMR8-5     | Abcam                | AB70328        |
|                 | Granzyme B | GrB7       | Dako                 | M7235          |

Validation CD68 Agilent Daki website: monoclonal mouse anti-human CD68, immunohistochemistry

## Validation

|            |                                                                                           |
|------------|-------------------------------------------------------------------------------------------|
| CD163      | Leica website: monoclonal mouse anti-human CD163, immunohistochemistry                    |
| CD11c      | Leica website: monoclonal mouse anti-human CD11c, immunohistochemistry                    |
| CD8        | Agilent Dako website: monoclonal mouse anti-human CD8, immunohistochemistry               |
| PD-1       | Cell Signaling Technology website: monoclonal mouse anti-human PD-1, immunohistochemistry |
| CD31       | Abcam website: polyclonal rabbit anti-human CD31, immunohistochemistry                    |
| Ang2       | Santa Cruz website: monoclonal mouse anti-human Ang2, immunohistochemistry                |
| FOXP3      | BioLegend website: monoclonal mouse anti-human FOXP3, immunohistochemistry                |
| CD45RA     | ThermoFisher website: monoclonal mouse anti-human CD45RA, immunohistochemistry            |
| CD45RO     | Dako website: monoclonal mouse anti-human CD45RO, immunohistochemistry                    |
| MHC-I      | Abcam website: monoclonal mouse anti-human MHC-I, immunohistochemistry                    |
| Granzyme B | Dako website: monoclonal mouse anti-human granzyme B, immunohistochemistry                |

## Human research participants

Policy information about [studies involving human research participants](#)

## Population characteristics

Enrollment required a pathological diagnosis of adenocarcinoma of the breast. Eligible TNBC patients were negative for ER, PR, and HER2, had a breast lesion  $\geq 1.5$  cm, and no evidence of distal metastasis. Patients with bilateral cancers were eligible as long as one cancer was eligible. Patients also required sufficient hematopoietic, hepatic, and renal function, along with a left ventricular ejection fraction  $\geq 50\%$ . Patients with any HER2-positive disease (amplified by FISH or IHC), a history of prior myocardial infarction, uncontrolled hypertension,  $\geq$  grade 2 neuropathy, significant bleeding within 6 months of study entry, or urine protein: creatinine ratio  $> 1$  were excluded.

## Recruitment

Enrollment in this phase II trial required a pathological diagnosis of adenocarcinoma of the breast. Eligible TNBC patients were negative for ER, PR, and HER2, had a breast lesion  $\geq 1.5$  cm, and no evidence of distal metastasis.

## Ethics oversight

This study was approved by the Dana–Farber/Harvard Cancer Center Institutional Review Board.

Note that full information on the approval of the study protocol must also be provided in the manuscript.

## Clinical data

Policy information about [clinical studies](#)

All manuscripts should comply with the ICMJE [guidelines for publication of clinical research](#) and a completed [CONSORT checklist](#) must be included with all submissions.

## Clinical trial registration

NCT00546156

## Study protocol

<https://clinicaltrials.gov/ct2/show/record/NCT00546156>

## Data collection

The core biopsies used in the current study were obtained in the Dept of Radiation Oncology at Dana-Farber Cancer Institute and Massachusetts General Hospital between 2007 and 2011. The multiplex immunofluorescence and quantitative analysis were performed between March 2017 and January 2021.

## Outcomes

The primary and secondary outcomes of the study were not correlated with the immune cell and blood vessel data of the current article.
